# Supplementary material for: Quaternary Structure and Hetero-Oligomerization of Recombinant Human Small Heat Shock Protein HspB7 (cvHsp)
Source: MDPI journal article supplement (doi:10.3390/ijms22157777), 2021-07-21
Supplement: s1 [file s1]

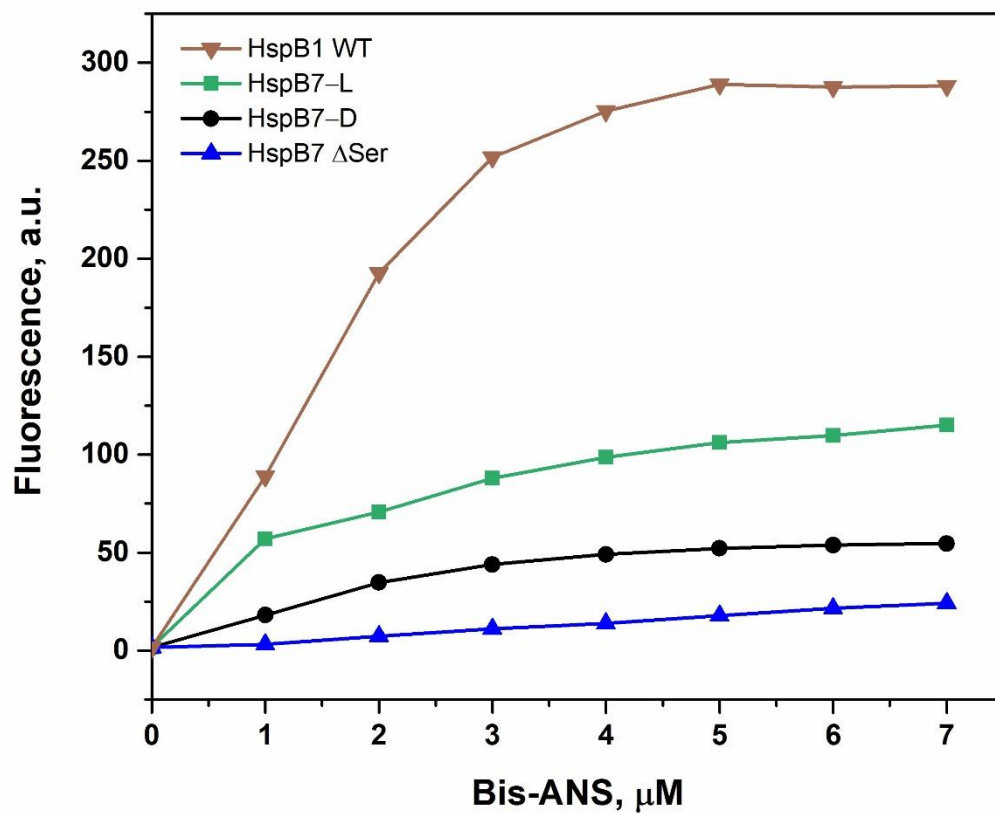

**Supplement Figure S1.** Surface hydrophobicity of HspB1 (brown), HspB7-L (green), HspB7-D (black) and  $\Delta\text{Ser}$  mutant of HspB7 (blue) studied by fluorescence probe bis-ANS. The wild type HspB1 was used as positive standard. Fluorescence was excited at 385 and recorded at 495 nm.

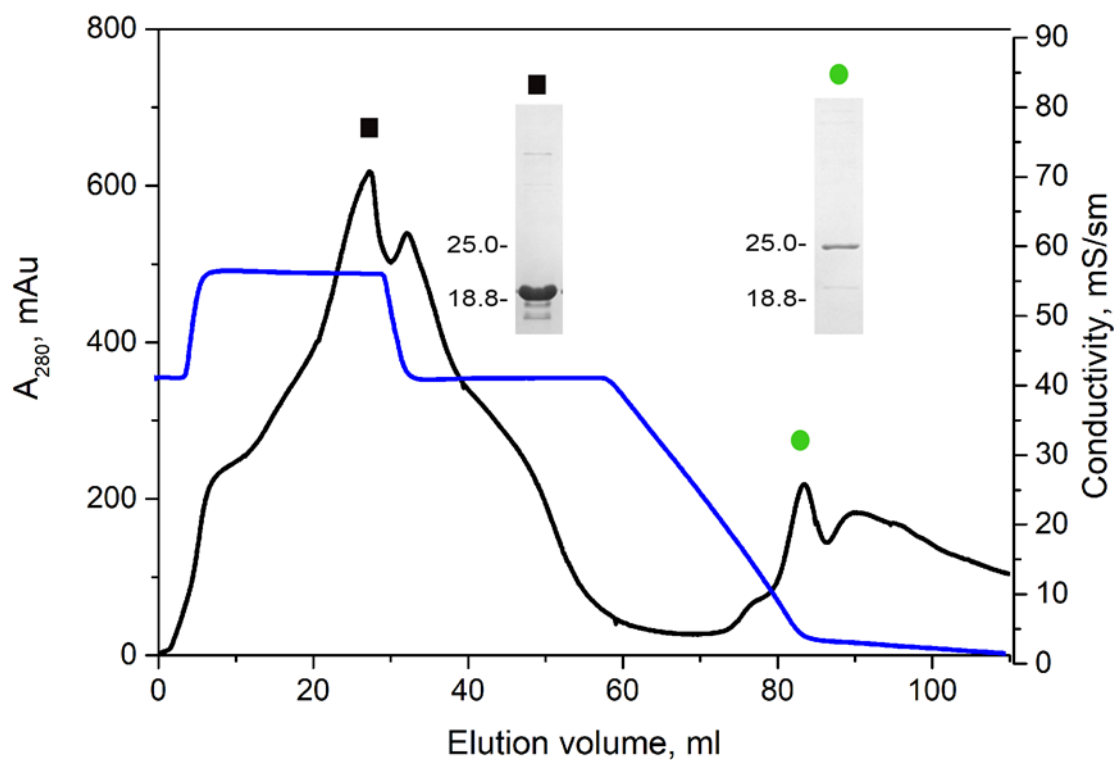

Supplement Figure S2. Chromatography of  $\Delta$ Ser mutant on HiTrap Phenyl-Sepharose. Crude preparation of  $\Delta$ Ser mutant of HspB7 was loaded on Phenyl-Sepharose and eluted by decreasing gradient of ammonium sulfate (blue line). SDS-PAGE of fractions marked by colored squares and circles are shown on inserts.
